# Supplementary material for: Effect of Sfrp5 on Cytokine Release and Insulin Action in Primary Human Adipocytes and Skeletal Muscle Cells
Source: PubMed Central journal article supplement (PMC3897555; doi:10.1371/journal.pone.0085906), 2014-01-21

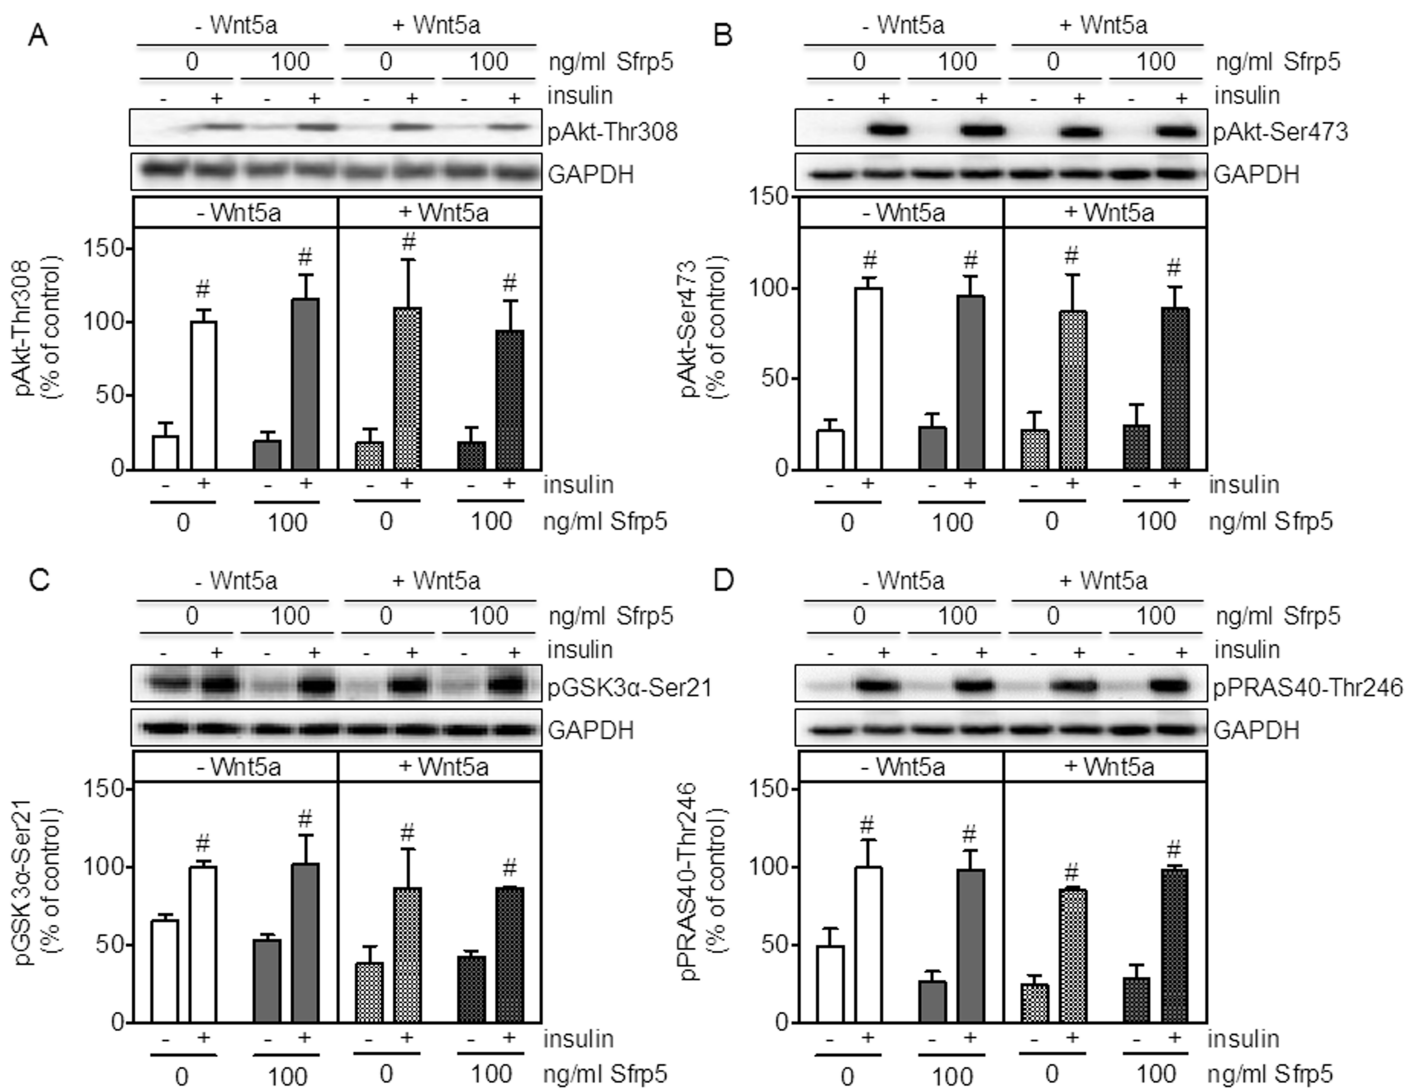

Supplement: pone.0085906.s002.pdf [file pone.0085906.s002.pdf]
